# Supplementary material
Source: PubMed Central journal article supplement (PMC6467290)
Supplement: NIHMS1016643-supplement-Supporting.pdf [file NIHMS1016643-supplement-Supporting.pdf]

*Supplementary Information for*

**Dynamic characteristics of GMP reductase complexes revealed  
by high resolution <sup>31</sup>P field cycling NMR relaxometry**

Masha M. Rosenberg<sup>‡</sup>, Alfred G. Redfield<sup>§</sup>, Mary F. Roberts<sup>¶\*</sup> and Lizbeth Hedstrom<sup>‡,£\*</sup>

From the <sup>‡</sup> Department of Biology, Brandeis University, MS009, 415 South St., Waltham MA 02453-9110 USA

<sup>§</sup> Department of Biochemistry, Brandeis University, MS009, 415 South Street, Waltham, MA 02453-9110 USA

<sup>¶</sup> Department of Chemistry, Boston College, 140 Commonwealth Avenue, Chestnut Hill, MA 02467-9110 USA

<sup>£</sup> Department of Chemistry, Brandeis University, 415 South Street, Waltham, MA 02453-3808 USA.

\* To whom correspondence should be addressed: Lizbeth Hedstrom, Department of Biology, Brandeis University, MS009, 415 South Street, Waltham, MA 02453-9110 USA. Tel: 781-736-2333; Fax: 781-736-2349; E-mail: [hedstrom@brandeis.edu](mailto:hedstrom@brandeis.edu); Mary Roberts, Department of Chemistry, Boston College, 140 Commonwealth Avenue, Chestnut Hill, MA 02467-9110. Tel: 617-552-3616; E-mail: [mary.roberts@bc.edu](mailto:mary.roberts@bc.edu).

**Supporting Table S1. Extrapolated  $^{31}\text{P}$ - $^1\text{H}$  distances.**

| $^{31}\text{P}$ distance        | Exp.             | IMP/GMP<br>monoP | NADP <sup>+</sup><br>monoP | NADP <sup>+</sup><br>diP |
|---------------------------------|------------------|------------------|----------------------------|--------------------------|
| WT•IMP<br>•NADP <sup>+</sup>    | H <sub>2</sub> O | 2.9 ± 0.2        | 2.8 ± 0.2                  | 3.0 ± 0.1                |
| WT•GMP<br>•NADP <sup>+</sup>    | H <sub>2</sub> O | 4.1 ± 0.2        | 3.1 ± 0.1                  | 3.2 ± 0.1                |
| WT•IMP<br>•NADP <sup>+</sup>    | D <sub>2</sub> O | 3.4 ± 1.2        | 3.4 ± 1.6                  | 3.6 ± 1.9                |
|                                 |                  |                  |                            | 3.5 ± 1.7                |
| WT•GMP<br>•NADP <sup>+</sup>    | D <sub>2</sub> O | 4.1 ± 2.0        | 3.7 ± 1.4                  | 3.8 ± 0.8                |
|                                 |                  |                  |                            | 3.5 ± 0.9                |
| WT•dIMP<br>•NADP <sup>+</sup>   | H <sub>2</sub> O | 3.5 ± 1.8        | 3.6 ± 1.1                  | 3.9 ± 1.0                |
|                                 |                  |                  |                            | 4.0 ± 1.0                |
| WT•dGMP<br>•NADP <sup>+</sup>   | H <sub>2</sub> O | 3.6 ± 1.8        | 3.1 ± 1.0                  | 3.3 ± 1.0                |
|                                 |                  |                  |                            | 3.2 ± 1.0                |
| D219A•IMP<br>•NADP <sup>+</sup> | H <sub>2</sub> O | 2.6 ± 0.9        | 2.8 ± 0.2                  | 3.3 ± 0.2                |
|                                 |                  |                  |                            | 3.3 ± 0.3                |
| D219A•GMP<br>•NADP <sup>+</sup> | H <sub>2</sub> O | 2.9 ± 1.2        | 3.2 ± 0.5                  | 3.8 ± 0.6                |
|                                 |                  |                  |                            | 3.7 ± 0.7                |

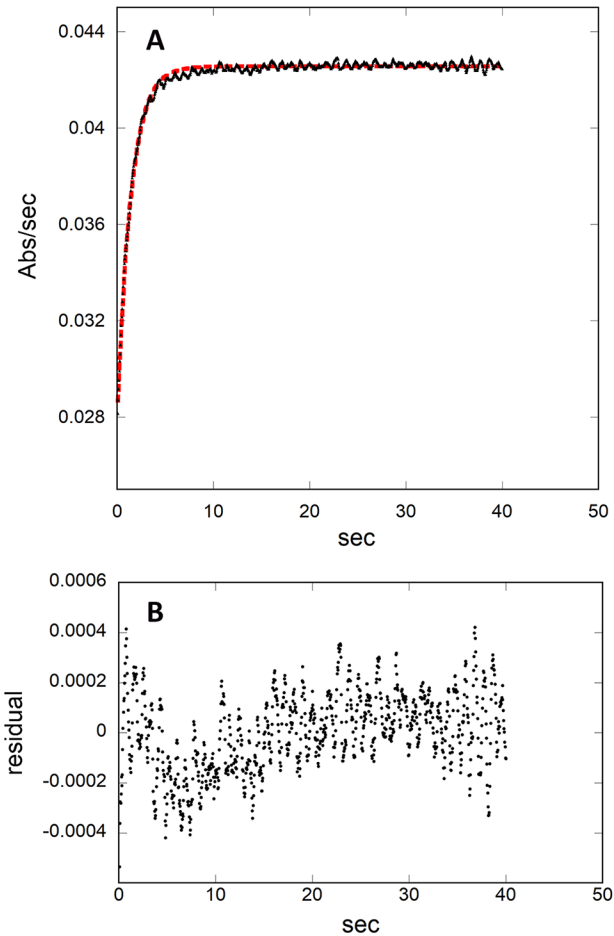

**Supplementary Figure S1. The partial reaction of IMP and NADP<sup>+</sup> catalyzed by GMPR WT.** Enzyme (10  $\mu$ M) was mixed with IMP (500  $\mu$ M) and NADP<sup>+</sup> (500  $\mu$ M) and the formation of NADPH is monitored by the change in absorbance at  $\lambda = 340$  nm. The amount of NADPH formed is ~16% of the active sites. **A.** A representative progress curve comprised of the average absorbance readings from at least 5 “shots”. The red line shows the fit to a single exponential equation. **B.** The residual errors on the fit in A.

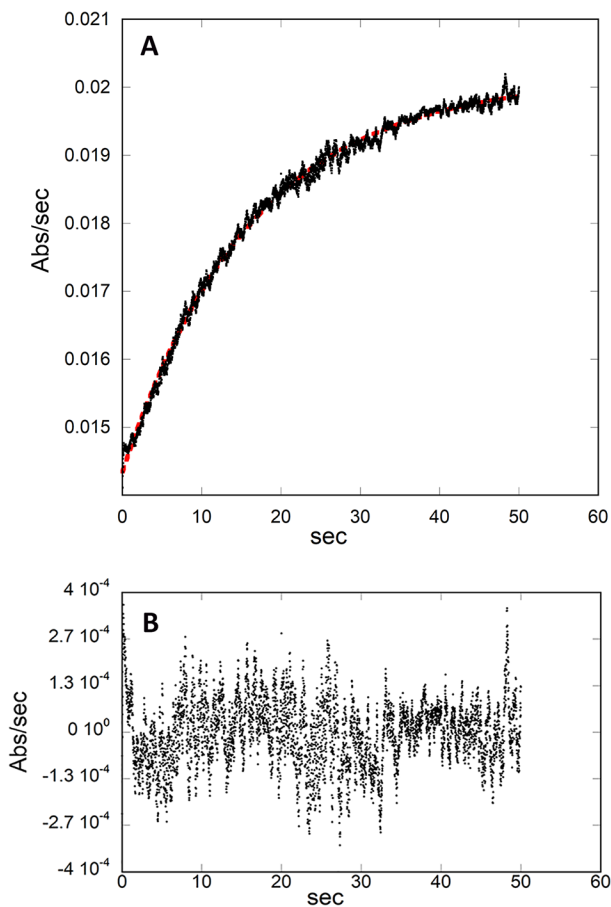

**Supplementary Figure S2. The partial reaction of dIMP and NADP<sup>+</sup> catalyzed by GMPR WT.** Enzyme (10  $\mu\text{M}$ ) was mixed with dIMP (500  $\mu\text{M}$ ) and NADP<sup>+</sup> (500  $\mu\text{M}$ ) and the formation of NADPH is monitored by the change in absorbance at  $\lambda = 340 \text{ nm}$ . The amount of NADPH formed is  $\sim 10\%$  of the active sites. **A.** A representative progress curve comprised of the average absorbance readings from at least 5 “shots”. The red line shows the fit to a single exponential equation. **B.** The residual errors on the fit in A.

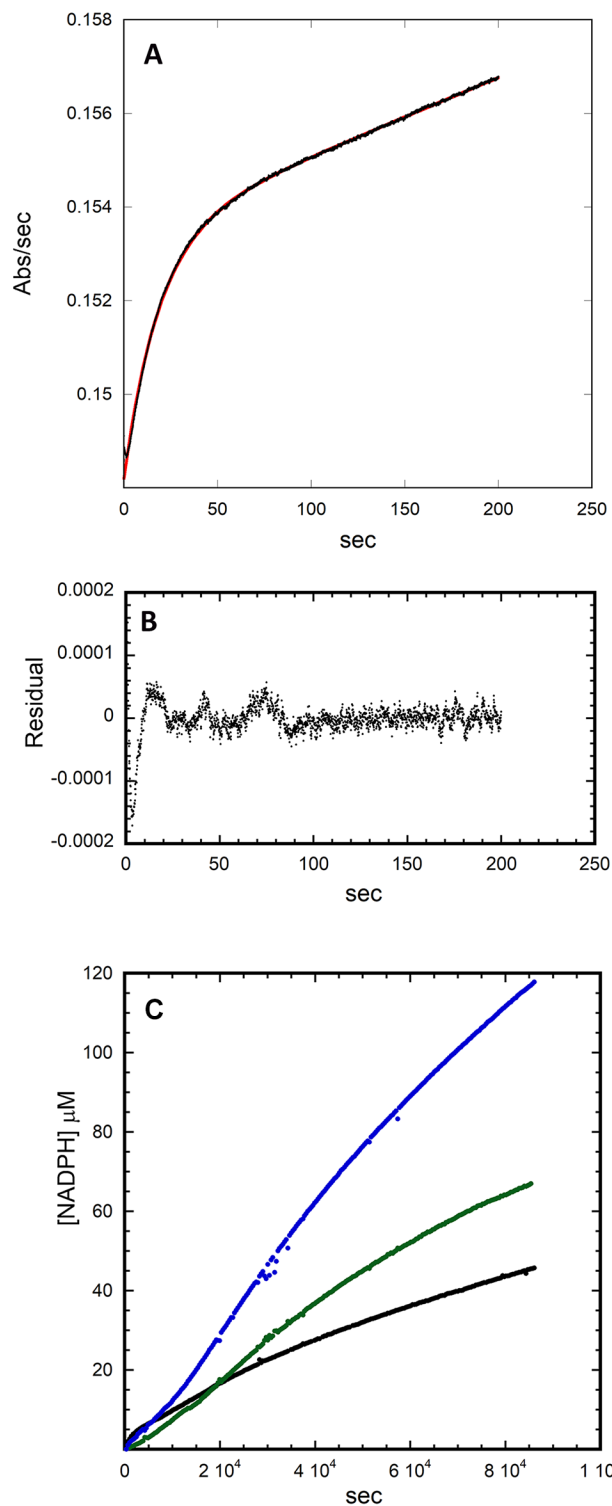

**Supplementary Figure S3. The partial reaction of IMP and NADP<sup>+</sup> catalyzed by GMPR mutant D219A.** **A.** A representative progress curve of the presteady state reaction comprised of the average absorbance readings from at least 5 “shots”. The red line shows the fit to a single exponential and a steady state. Enzyme (30  $\mu$ M) was mixed with IMP (10 mM) and NADP<sup>+</sup> (3 mM) and the formation of NADPH is monitored by the change in absorbance at  $\lambda =$

340 nm. The amount of NADPH formed is ~3% of the active sites after the burst phase. The apparent steady state rate is  $0.001 \text{ s}^{-1}$ . **B.** The residual errors on the fit in A. **C.** The partial reaction of IMP and  $\text{NADP}^+$  catalyzed by D219A monitored for 24 hours. Formation of NADPH is monitored by the change in absorbance at  $\lambda = 340 \text{ nm}$ . Initial rates were determined over the first 10 min. *Black line*: conditions of the pre-steady state experiment: enzyme ( $30 \text{ }\mu\text{M}$ ) was mixed with saturating IMP ( $10 \text{ mM}$ ) and  $\text{NADP}^+$  ( $3 \text{ mM}$ ), initial rate =  $6.3 \times 10^{-5} \text{ s}^{-1}$ ; *Green line*: conditions of the field cycling experiment: enzyme ( $400 \text{ }\mu\text{M}$ ) was mixed with IMP ( $1.6 \text{ mM}$ ) and  $\text{NADP}^+$  ( $1.6 \text{ mM}$ ), initial rate =  $1.4 \times 10^{-5} \text{ s}^{-1}$ ; *Blue line*: enzyme ( $400 \text{ }\mu\text{M}$ ) was mixed with saturating IMP ( $10 \text{ mM}$ ) and  $\text{NADP}^+$  ( $3 \text{ mM}$ ), initial rate =  $3.5 \times 10^{-6} \text{ s}^{-1}$ . These observations suggest that the enzyme is 41% saturated with IMP and  $\text{NADP}^+$  under the conditions of the field cycling experiment.
